# Supplementary material for: Natural Polymorphism in BUL2 Links Cellular Amino Acid Availability with Chronological Aging and Telomere Maintenance in Yeast
Source: PLoS Genet. 2011 Aug 25;7(8):e1002250. doi: 10.1371/journal.pgen.1002250 (PMC3161923; doi:10.1371/journal.pgen.1002250)
Supplement: Table S1 — List of S. cerevisiae strains used in this study. (XLS) [file pgen.1002250.s005.xls]

## Sheet: Sheet1
Table S1: List of S. cerevisiae strains used in this study.
Lab Number	Background	MAT	Genotype	Notes	Figures
in plate	RMxBY		Segregant library (amn1::NAT)	Segregant library	1, 2B, 3B, 4A, 5A
15212	RM11-1a	a	leu2d0 ura3d0 HO::KanMX amn1::NAT	RM parent	2A, 2D, 3A, 3D, 4B, 4C
15213	BY4716	α	lys2d0 amn1::NAT	BY parent	2A
15214	BY4716	α	lys2d0 amn1::NAT ura3::KanMX	for BUL2 allele replacement	2D, 3A, 3C, 4B, 4C
15222	BY4716	α	lys2d0 amn1::NAT ura3::KanMX BUL2RM #1	BY BUL2 allele replacement	2D, 3A, 3C, 4B, 4C
15224	BY4716	α	lys2d0 amn1::NAT ura3::KanMX BUL2RM #2	BY BUL2 allele replacement	2D, 3A, 3C, 4B, 4C
15226	BY4716	α	lys2d0 amn1::NAT ura3::KanMX BUL2(L883F) #3	BY BUL2 allele replacement - point mutation	2D, 3A, 3C, 4B, 4C
15254	BY4716	α	lys2d0 amn1::NAT ura3::KanMX bul2::HYG	BY bul2Δ strain	3C, 4C
15181	RM11-1a	a	leu2d0 ura3d0 HO::KanMX amn1::NAT BUL2BY #1	RM BUL2 allele replacement	2A, 2D, 3A, 3D, 4B, 4C
15182	RM11-1a	a	leu2d0 ura3d0 HO::KanMX amn1::NAT BUL2BY #2	RM BUL2 allele replacement	2A, 2D, 3A, 3D, 4B, 4C
15253	RM11-1a	a	leu2d0 ura3d0 HO::KanMX amn1::NAT bul2::HYG	RM bul2Δ	2D, 3D, 4C
14141	BY4741	a	leu2d0 ura3d0 met15d0 his3d0	deletion consortium wildtype strain	5B, 5C, supplemental
15272	BY4742	a	leu2d0 ura3d0 met15d0 his3d0 ure2::KanMX	ure2Δ deletion consortium	5B
15361	BY4742	α	leu2d0 ura3d0 lys2d0 his3d0 yku70::KanMX	yku70Δ deletion consortium	supplemental
in plate	BY4742	α	leu2d0 ura3d0 lys2d0 his3d0 tel1::KanMX	tel1Δ deletion consortium	supplemental
in plate	BY4741	a	leu2d0 ura3d0 met15d0 his3d0 tel1::KanMX	tel1Δ deletion consortium	supplemental
15351	BY4741	diploid	leu2d0/leu2d0 ura3d0/ura3d0 met15d0/+ his3d0/his3d0 lys2/+ ure2::NAT/+ tlc1::KanMX/+	tlc1Δ epistasis	supplemental
in plate	BY4741	a	leu2d0 ura3d0 met15d0 his3d0 tor1::KanMX	tor1Δ	5B, supplemental
in plate	BY4741	a	leu2d0 ura3d0 met15d0 his3d0 wtm1::KanMX	wtm1Δ	supplemental
in plate	BY4741	a	leu2d0 ura3d0 met15d0 his3d0 rif11::KanMX	rif1Δ; Long telomere mutant	supplemental
in plate	BY4741	a	leu2d0 ura3d0 met15d0 his3d0 rif21::KanMX	ri21Δ; Long telomere mutant	supplemental
in plate	BY4741	a	leu2d0 ura3d0 met15d0 his3d0 ard1::KanMX	ard1Δ; Long telomere mutant	supplemental
in plate	BY4741	a	leu2d0 ura3d0 met15d0 his3d0 rsa1::KanMX	rsa1Δ; Long telomere mutant	supplemental
15271	BY4741	a	leu2d0 ura3d0 met15d0 his3d0 gln3::KanMX	gln3Δ deletion consortium	5C
15335	BY4741	a	leu2d0 ura3d0 met15d0 his3d0 ure2::NAT	ure2Δ telomere length	5C, 7B, supplemental
15276	BY4741	a	leu2d0 ura3d0 met15d0 his3d0 ure2::KanMX gln3::NAT	gln3Δ rescue of ure2Δ	5C
15277	BY4741	a	leu2d0 ura3d0 met15d0 his3d0 ure2::KanMX gln3::NAT	gln3Δ rescue of ure2Δ	5C
15285	BY4741	a	leu2d0 ura3d0 met15d0 his3d0 gln3::KanMX ure2::NAT	gln3Δ rescue of ure2Δ	5C
15286	BY4741	a	leu2d0 ura3d0 met15d0 his3d0 gln3::KanMX ure2::NAT	gln3Δ rescue of ure2Δ	5C
15395	BY4716	α	lys2d0 amn1::NAT ura3::KanMX gln3::URA3	gln3Δ epistasis	5D
15398	BY4716	α	lys2d0 amn1::NAT ura3::KanMX BUL2RM gln3::URA3	gln3Δ epistasis	5D
15399	BY4716	α	lys2d0 amn1::NAT ura3::KanMX BUL2RM gln3::URA3	gln3Δ epistasis	5D
15400	BY4716	α	lys2d0 amn1::NAT ura3::KanMX BUL2(L883F) gln3::URA3	gln3Δ epistasis	5D
15287	RM11-1a	a	leu2d0 ura3d0 HO::KanMX amn1::NAT gln3::URA3	gln3Δ epistasis	5D
15379	RM11-1a	a	leu2d0 ura3d0 HO::KanMX amn1::NAT BUL2BY gln3::URA3	gln3Δ epistasis	5D
15380	RM11-1a	a	leu2d0 ura3d0 HO::KanMX amn1::NAT BUL2BY gln3::URA3	gln3Δ epistasis	5D
15965	RM11-1a	a	leu2d0 ura3d0 HO::HYG amn1::NAT WTM1-3HA-KanMX	Wtm1 expression	6A
15966	RM11-1a	a	leu2d0 ura3d0 HO::HYG amn1::NAT BUL2BY WTM1-3HA-KanMX	Wtm1 expression	6A
15983	RM11-1a	a	leu2d0 ura3d0 HO::HYG amn1::NAT bul2::URA3 WTM1-3HA-KanMX	Wtm1 expression	6A
15967	BY4716	α	lys2d0 amn1::NAT ura3::HYG WTM1-3HA-KanMX	Wtm1 expression	6A
15968	BY4716	α	lys2d0 amn1::NAT ura3::HYG BUL2(L883F) WTM1-3HA-KanMX	Wtm1 expression	6A
15969	BY4716	α	lys2d0 amn1::NAT ura3::HYG BUL2::HYG WTM1-3HA-KanMX	Wtm1 expression	6A
15970	BY4741	a	leu2d0 ura3d0 met15d0 his3d0 WTM1-3HA-KanMX	Wtm1 expression	6A
15971	BY4741	a	leu2d0 ura3d0 met15d0 his3d0 ure2::NAT WTM1-3HA-KanMX	Wtm1 expression	6A
15728	BY	a	from BY4712xBY4716, auxotroph free spore	auxotroph free
15729	BY	α	from BY4712xBY4716, auxotroph free spore	auxotroph free
15878	BY4741	a	RNR4-GFP (UCSF/Invitrogen)	Rnr4-GFP	6B, 6C
15890	BY4741	a	RNR4-GFP ure2::HYG	Rnr4-GFP ure2Δ	6B, 6C
15902	BY4741	a	RNR4-GFP ure2::HYG wtm1::KanMX	Rnr4-GFP ure2Δwtm1Δ	6B, 6C
15894	BY4741	a	RNR4-GFP wtm1::HYG	Rnr4-GFP wtm1Δ	6B, 6C
15957	RM11-1a	a	leu2d0 ura3d0 HO::HYG amn1::NAT RNR4-GFP-KanMX	RM Rnr4-GFP	6B, 6C
15959	RM11-1a	a	leu2d0 ura3d0 HO::HYG amn1::NAT RNR4-GFP-KanMX BUL2BY#1	RM BUL2BY Rnr4-GFP	6B, 6C
15980	RM11-1a	a	leu2d0 ura3d0 HO::HYG amn1::NAT RNR4-GFP-KanMX bul2::URA3	RM bul2Δ Rnr4-GFP	6B, 6C
15961	BY4716	α	lys2d0 amn1::NAT ura3::HYG RNR4-GFP-KanMX	BY Rnr4-GFP	6B, 6C
15962	BY4716	α	lys2d0 amn1::NAT ura3::HYG BUL2(L883F) wtm1-3HA-KanMX	BY BUL2RM(L883F) Rnr4-GFP	6B, 6C
15963	BY4716	α	lys2d0 amn1::NAT ura3::HYG BUL2(L883F) wtm1-3HA-KanMX	BY BUL2RM(L883F) Rnr4-GFP	6B, 6C
15964	BY4716	α	lys2d0 amn1::NAT ura3::HYG bul2::HYG RNR4-GFP-KanMX	BY bul2Δ Rnr4-GFP	6B, 6C
15853	BY	α	wtm1::HYG	wtm1Δ epistasis rescue	7A
15743	BY	a	ure2::Nat	wtm1Δ epistasis rescue	7A
14606	BY4741	a	leu2d0 ura3d0 met15d0 his3d0 sml1::NAT	sml1Δ epistasis rescue
in plate	BY4742	α	leu2d0 ura3d0 lys2d0 his3d0 sml1::KanMX	sml1Δ epistasis rescue	7B
